# Supplementary material for: Associations of anthropometric indices with body adiposity for assessing cardiovascular risk in people living with HIV: a cross-sectional study
Source: PeerJ. 2025 Oct 20;13:e18833. doi: 10.7717/peerj.18833 (PMC12548633; doi:10.7717/peerj.18833)
Supplement: Supplemental Information 1 [file peerj-13-18833-s001.xlsx]

## Sheet: BASELINE
Number	Age	Sex	Marital status	Weight	Height	Education	Occupation	Income	Income class	Home	Infeccion time	Infeccion time Class	ART time	ART time Class	ART	Diseases	CVD History	CVD Comorbidities	%Total fat T0	Class %Fat T0	Fat (Kg) T0	%Arms T0	%Legs T0	%Stem T0	%Android T0	%Gynoid T0	Rate A/G T0	FFM (Kg) T0	Slim (Kg) T0	BMI T0	Class BMI T0	Waist-to-Hip Ratio (WHR)	Class WHR	Waist-to-Height Ratio (WHtR)	Class WHtR	CI	Class CI	Abdominal Circumference 1	Abdominal Circumference 2	Abdominal Circumference 3	CA Average	Waist Circumference 1	Waist Circumference 2	Waist Circumference 3	WC Average	Hip Circumference 1	Hip Circumference 2	Hip Circumference 3	HC Average
2	57	1	3	66.7	159	2	Retired military	2500	2	3	27y10m	2	25y7m	2	Tenofovir, Lamivudina, Atazanavir, Ritonavir	4	2	1	36	7	23.4	33.3	29.9	41.4	43.8	36.8	1.19	43.3	41.6	26.3	3	1.01	1	0.61	1	1.38	1	101.2	102	101.3	101.5	98.1	97.8	98.6	98.1667	97.5	97.8	97.1	97.4667
4	53	1	2	71.3	162	2	Counter	8000	3	2	20y5m	2	20y5m	2	Dolutegravir, Lamivudina	999	1	1	27.6	5	19.1	18.8	16.1	34.7	38.1	16.3	2.34	52.2	50	27.6	3	1.02	1	0.58	1	1.3	1	95	95.1	95	95.0333	93.5	93.7	93.5	93.5667	91.2	91	91.5	91.2333
6	28	1	1	90.1	168	2	Student	4236	3	1	4y	1	4y	1	Dolutegravir, Lamivudina	3	2	1	39.6	7	34.6	34.8	38.5	43.4	47.5	40.9	1.16	55.2	52.8	32.3	4	0.86	2	0.54	1	1.15	2	103.8	104.5	104.4	104.233	91.7	91.6	91.2	91.5	105.3	105.5	105.8	105.533
7	55	2	1	66.9	167	1	From home	600	1	1	23y6m	2	23y6m	2	Dolutegravir, Lamivudina	2	2	1	39.8	7	25.6	34.1	20.7	50.6	53.3	29.4	1.81	40.8	38.8	24	2	0.91	1	0.56	1	1.36	1	95.5	95.5	95.4	95.4667	94	94	94	94	103.5	103.5	103.3	103.433
9	57	1	1	59.9	162	1	Retiree	2000	2	1	15y	2	14y	2	Dolutegravi, Biovi	999	2	2	21.7	2	12.6	18.5	15.5	26	29.5	20.5	1.44	47.5	45.5	22.8	2	0.96	1	0.54	1	1.31	1	90	89.9	90	89.9667	87.5	86.9	87.4	87.2667	91	91.2	91	91.0667
10	36	1	1	59.5	161	2	Student	1412	1	3	14y9m	2	13y9m	2	Dolutegravir, Lamivudina	999	2	2	22.9	4	13.2	18.7	14.6	28.2	28.5	18.7	1.52	46.5	44.5	23	2	0.99	1	0.5	2	1.21	2	79.8	79.8	79.8	79.8	79.5	79.6	79.8	79.6333	80.5	81	81	80.8333
11	59	2	3	55.8	152	1	From home	1412	1	2	22y5m	2	22y4m	2	Dolutegravir, Ritonavir, Darunavir	2.3	2	1	39.1	7	21.1	40.9	40.4	40.2	42.4	46.8	0.91	34.6	33	24.2	2	0.76	2	0.49	2	1.14	2	83	83.2	83.2	83.1333	74.5	74.6	74.7	74.6	98.5	98.5	98.6	98.5333
12	46	1	1	81.5	166	1	Repographer	1412	1	1	10y	1	10y	1	Dolutegravir, Tenofovir, Lamivudina	999	2	2	33.6	7	26.6	26.2	29.3	39	41	34.7	1.18	55	52.4	29.6	3	0.91	1	0.57	1	1.23	2	96.6	96.7	97.2	96.8333	94.6	93.8	93.5	93.9667	102.8	102.8	103	102.867
1	56	1	1	59.8	169	1	Retiree	2000	2	1	19y6m	2	19y6m	2	Dolutegravir, Lamivudina	2	2	1	32.3	7	18.9	29.3	26.3	37.9	41.4	29.9	1.38	41.6	39.5	20.9	2	0.94	1	0.49	2	1.37	1	89	89.2	89.3	89.1667	84.5	84.3	84	84.2667	89.2	89.8	89.8	89.6
3	35	1	1	71.3	170	1	Couturier	2000	2	2	8y8m	1	8y5m	1	Dolutegravir, Lamivudina	999	2	2	25.2	6	17.3	23.8	23.4	27.3	32	21.7	1.48	53.9	51.6	24.6	2	0.89	2	0.47	2	1.13	2	82	82	81	81.6667	80	79	80	79.6667	90	91	88	89.6667
5	49	2	1	76.9	163	1	Manicure	1347	1	3	31y8m	2	18y2m	2	Dolutegravir, Lamivudina	999	2	2	41.3	7	30.5	42.1	36.7	46.3	49.7	45.6	1.09	45.9	43.4	26.3	3	0.85	1	0.55	1	1.2	1	98	98.2	98	98.0667	89.9	90	90.3	90.0667	106	106	106.1	106.033
8	50	1	1	63.8	165	1	Retiree	1412	1	1	21y3m	2	15y6m	2	Dolutegravir, Lamivudina	999	2	2	22.2	3	13.8	18.4	20.5	24.3	24.6	25	0.99	50.2	48.3	23.4	2	0.93	1	0.56	1	1.35	1	95	95.2	95	95.0667	92	92	92.1	92.0333	98.3	98.5	98.3	98.3667
13	43	1	1	86.9	172	2	Geography teacher	4700	3	1	12y2m	1	5y2m	1	Dolutegravir, Lamivudina	999	2	2	35.6	7	30	30.7	31.7	41.1	44.5	35.5	1.25	56.9	54.2	29.4	3	0.91	1	0.55	1	1.23	2	101.4	101.5	101	101.3	95.1	95	95.2	95.1	104.6	104.4	103.8	104.267
14	42	1	1	70.1	172	2	Advertising	2500	2	1	11y5m	2	11y5m	2	Dolutegravir, Lamivudina	999	2	2	20.9	3	14	16.7	19.1	23.1	22.5	20.6	1.09	55.9	53.3	23.7	2	0.94	1	0.52	1	1.29	1	91	91.3	91.2	91.1667	89.8	89.8	90	89.8667	95	95.1	95.4	95.1667
15	39	1	1	65	167	1	Human resources	1800	2	1	11y6m	2	11y6m	2	Dolutegravir, Ritonavir, Darunavir	999	2	2	21.5	4	13.4	16.8	17.7	24.8	24.3	23	1.06	51.6	48.9	23.3	2	0.92	1	0.49	2	1.26	1	79	78.7	78.8	78.8333	81.6	81.7	81.3	81.5333	88.4	88.5	88.5	88.4667
16	57	1	1	65.6	1.68	1	Nursing assistant	1412	1	1	19y	2	19y	2	Lamivudina, Dolutegravir	999	2	2	27.9	5	45.7	23.4	20.2	34.1	38.2	24.2	1.58	47.9	45.7	23.2	2	0.65	2	0.39	2	0.97	2	97	97	97.2	97.0667	94.2	94	93.9	94.0333	101.5	101	101.5	101.333
17	32	1	1	67.1	160	1	Nursing technician	2000	2	1	3y	1	3y	1	Dolutegravir, tenofovir, lamivudina	4	2	2	29.9	7	19.4	22.7	25.8	35.3	38.3	31.9	1.2	47.6	45.4	26.2	3	0.93	1	0.59	1	1.32	1	95	95.1	95.4	95.1667	94	93.7	9.39	65.6967	101.4	101.5	101.3	101.4
18	35	1	1	48.9	1.7	2	Librarian	1412	1	3	10y	1	9y	1	Dolutegravir, Ritonavir, Darunavir	999	2	2	22.9	5	10.7	18.1	24.7	23	20.7	22.9	0.9	38	35.9	17.3	1	999	999	999	999	999	999	999	999	999	999	999	999	999	999	999	999	999	999
			LEGEND! ART: Antiretroviral Therapy; T0: baseline; FFM: Fat free mass; BMI: Body mass index; A/G: Android/Gynoid; WHR: Waist-to-Hip Ratio; WHtR: Waist-to-height Ratio; CI: Conicity index; CA: Circumference Abdominal; WC: Waist Circumference; HC: Hip Circumference; CVD: Cardiovascular disease
